# Supplementary material
Source: publisher site journal article supplement (https://www.dovepress.com/article/387386)
Supplement: Supplementary file 1 [file get_supplementary_file.php]

**Table S1.** Clinical characteristics and blood biochemistry of the patients.

|  | HS | DS1 | DS2 |
| --- | --- | --- | --- |
| Age, years | 55 | 40 | 60 |
| Gender | Male | Female | Female |
| Hypoglycemic drugs  (metformin/glibenclamide) | ― | yes | yes |
| SBP, mmHg | 140 | 130 | 110 |
| DBP, mmHg | 80 | 80 | 70 |
| Glucose, mmol/L | 5.3 | 7.94 | 7.44 |
| TC, mmol/L | 3.49 | 5.42 | 5.36 |
| TG, mmol/L | 2.07 | 2.07 | 1.92 |

**Abbreviations:** SBP, systolic blood pressure; DBP, diastolic blood pressure; TC, total cholesterol; TG, triglycerides.

**
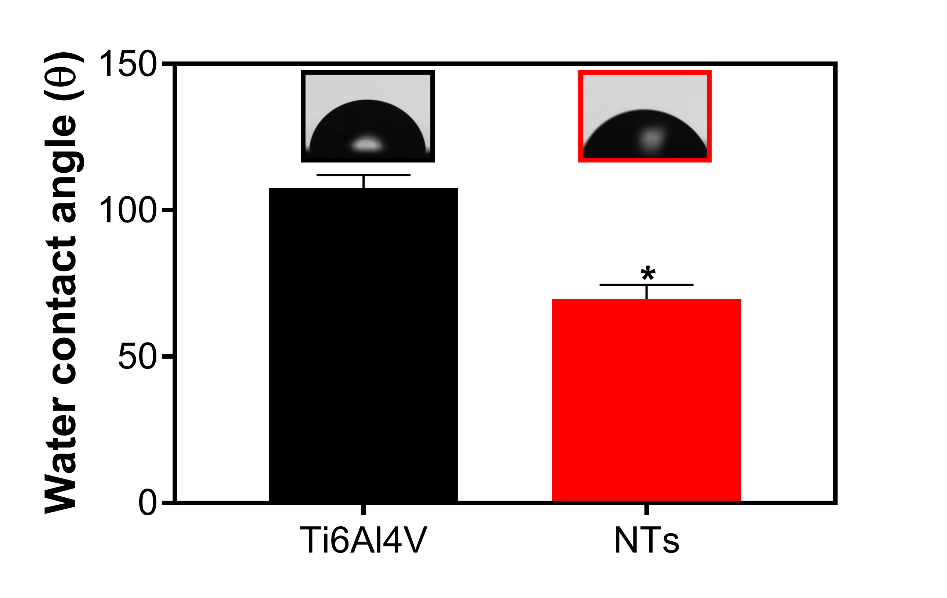
**

**Figure S1.** WCA of the Ti6Al4V control alloy and NTs. The * shows significant differences.


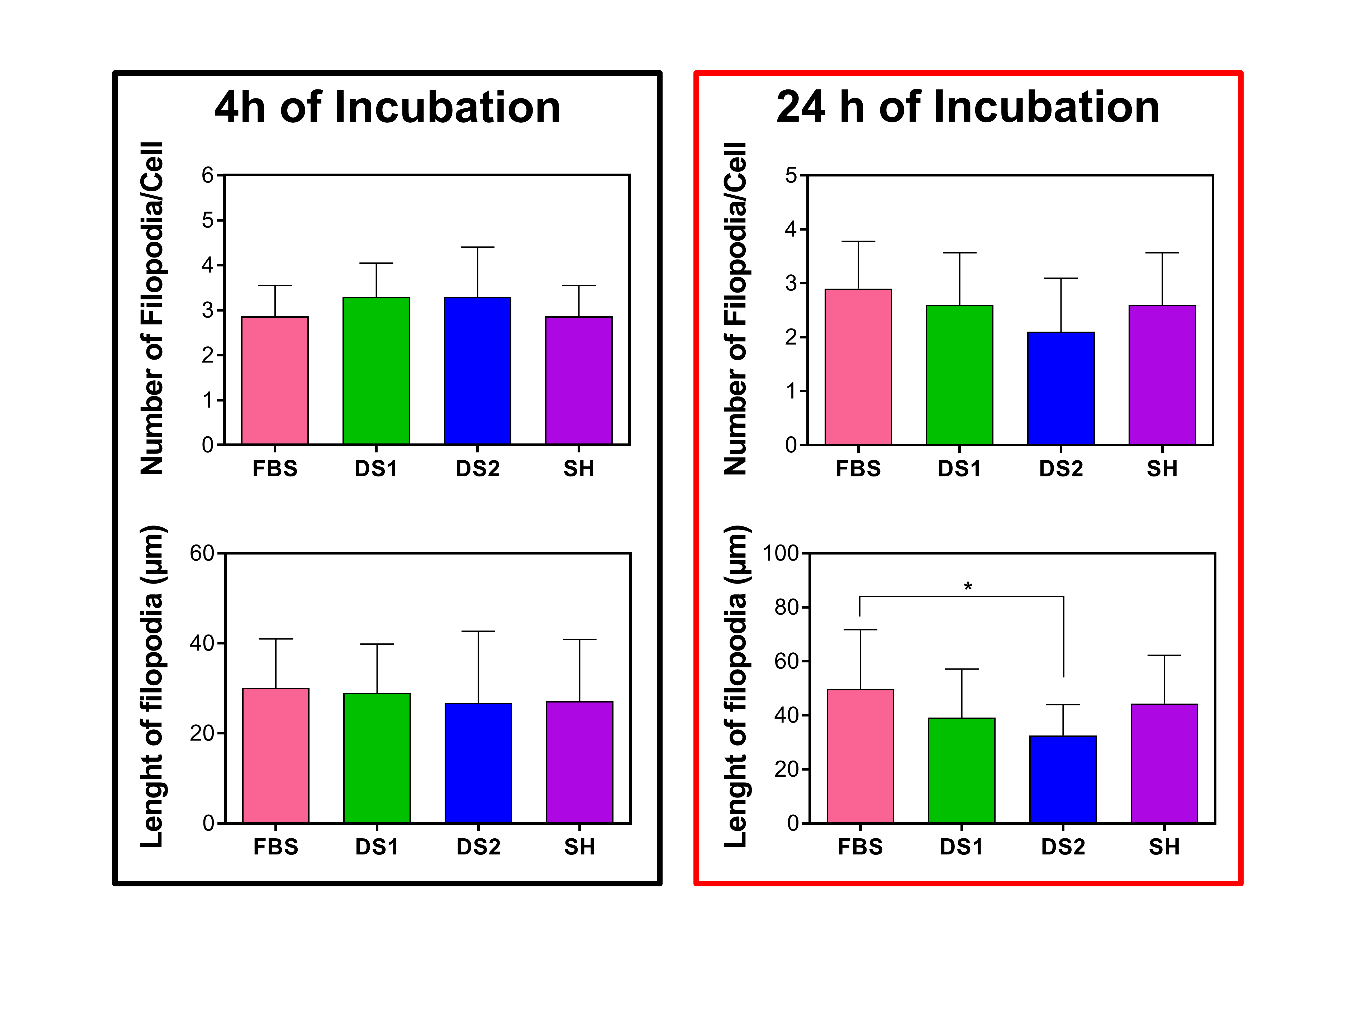


**Fig. S2.** Numbers and length of filopodia from attached MC3T3E-1 cells on the NTs after 4 and 24h of incubation under the experimental serums. The * shows significant differences.

**
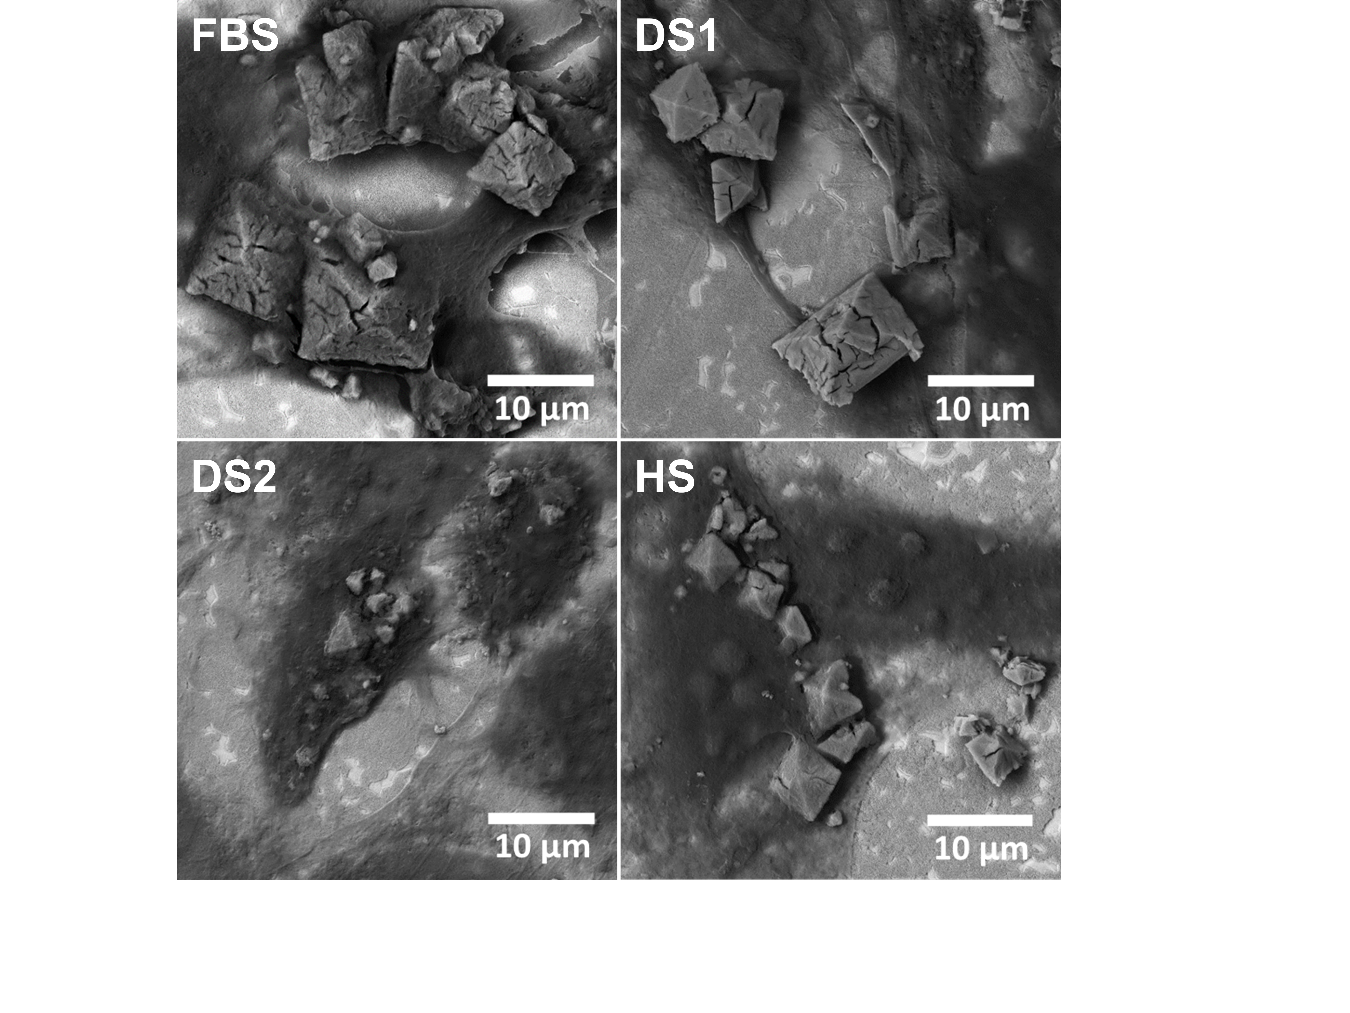
**

**Fig. S3.** FE-SEM crystal characterization of the mineralized osteoblasts after 21 days of osteogenic induction under the experimental serums. Magnification is 5,000 X.
